# Supplementary material for: Adhesion Forces of Oral Bacteria to Titanium and the Correlation with Biophysical Cellular Characteristics
Source: MDPI journal article supplement (doi:10.3390/bioengineering9100567), 2022-10-17
Supplement: s1 [file s1]

# Adhesion Forces of Oral Bacteria to Titanium and the Influence of Cellular Characteristics

Katharina Doll<sup>1,4\*</sup>, Andreas Winkel<sup>1,4</sup>, Ines Yang<sup>1,4</sup>, Anna Josefine Grote<sup>1,4</sup>, Nils Meier<sup>2</sup>, Mosaieb Habib<sup>3,4,5</sup>, Henning Menzel<sup>2</sup>, Peter Behrens<sup>3,4,5</sup>, Meike Stiesch<sup>1,4</sup>

<sup>1</sup> Department of Prosthetic Dentistry and Biomedical Materials Science, Hannover Medical School, Carl-Neuberg-Str. 1, 30625 Hannover, Germany

<sup>2</sup> Institute for Technical Chemistry, Technische Universität Braunschweig, Hagenring 30, 38106 Braunschweig, Germany

<sup>3</sup> Institute of Inorganic Chemistry, Leibniz University Hannover, Callinstr. 9, 30167 Hannover, Germany

<sup>4</sup> Lower Saxony Centre for Biomedical Engineering, Implant Research and Development (NIFE), Stadtfeldamm 34, 30625 Hannover, Germany

<sup>5</sup> Cluster of Excellence Hearing4All, Hannover, Germany

\* Correspondence: doll.katharina@mh-hannover.de

**Table S1.** Parameter settings for analysis of force-distance curves from single cell force spectroscopy using the AtomicJ software.[1]

| Parameter                     | Setting                                                                                                                                 |
|-------------------------------|-----------------------------------------------------------------------------------------------------------------------------------------|
| <b>Processing – Automatic</b> |                                                                                                                                         |
| Contact estimator             | Classical golden                                                                                                                        |
| Estimation method             | based on contact model                                                                                                                  |
| Model fit                     | Classical (L2)                                                                                                                          |
| Fit to                        | Withdraw (for maximum adhesion, attachment points, and detachment distance)<br>Approach (for Young's modulus)                           |
| <b>Model</b>                  |                                                                                                                                         |
| Model                         | Sphere (JKR)                                                                                                                            |
| Radius (µm)                   | 0.375 (for <i>S. oralis</i> , <i>P. gingivalis</i> and <i>A. ac</i> )<br>0.5 (for <i>A. naeslundii</i> )<br>0.5 (for <i>V. dispar</i> ) |
| <b>Sample</b>                 |                                                                                                                                         |
| Poisson ratio                 | 0.5                                                                                                                                     |
| Adhesive energy               | Calculate from fit                                                                                                                      |
| <b>Calibration</b>            |                                                                                                                                         |
| Spring (N/m)                  | Read-in                                                                                                                                 |
| Sensitivity (µm/V)            | Read-in                                                                                                                                 |

[1] Hermanowicz, P.; Sarna, M.; Burda, K.; Gabrys, H. AtomicJ: An Open Source Software for Analysis of Force Curves Review of Scientific Instruments 2014, 85, 063703.

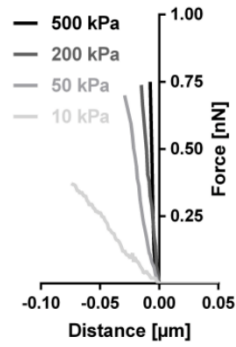

**Figure S1.** Representative force distance curves for indicated Young's moduli measured as bacterial cell elasticity.

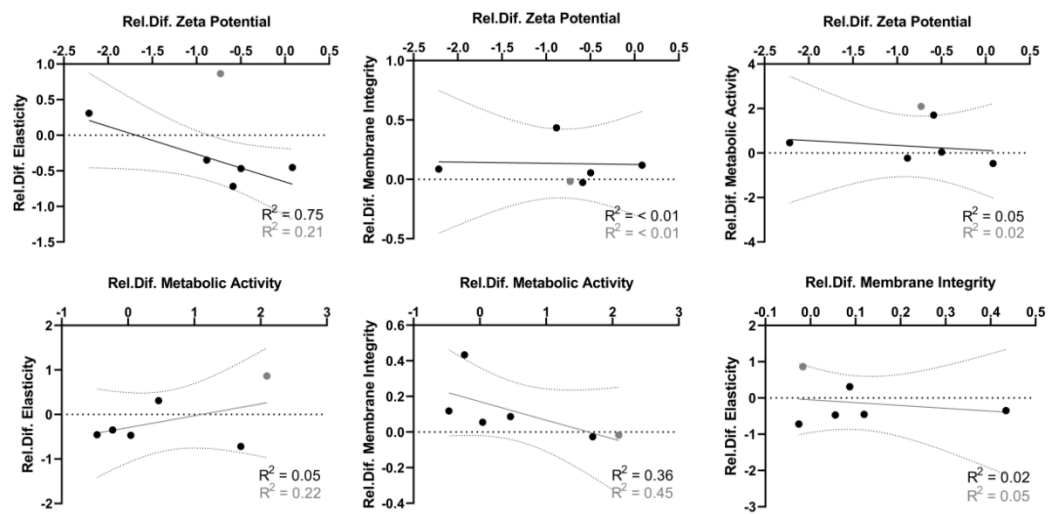

**Figure S2.** Linear regression analysis between different cellular parameters across species. Each black dot represents the relative difference of respective values in PBS to RTF buffer for one species. Values for *S. oralis* are shown as grey dots. Linear regression fit is shown with 95 % confidence interval and the corresponding correlation coefficient  $R^2$ . For black lines and  $R^2$ , *S. oralis* was excluded from calculation. Grey lines and  $R^2$  also include the grey values of *S. oralis*.

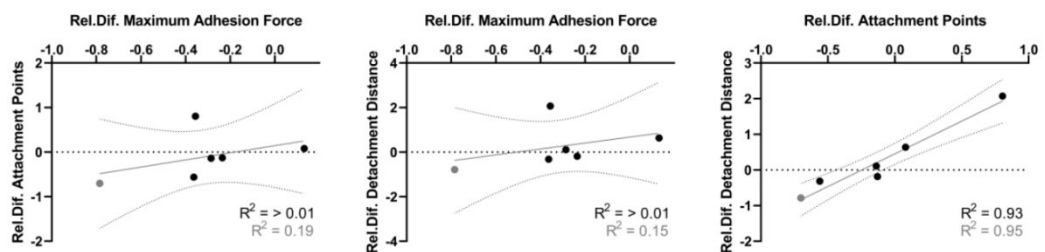

**Figure S3.** Linear regression analysis between different adhesion force parameters across species. Each black dot represents the relative difference of respective values in PBS to RTF buffer for one species. Values for *S. oralis* are shown as grey dots. Linear regression fit is shown with 95 % confidence interval and the corresponding correlation coefficient  $R^2$ . For black lines and  $R^2$ , *S. oralis* was excluded from calculation. Grey lines and  $R^2$  also include the grey values of *S. oralis*.
